# Supplementary material for: Effects of a focused training on first-year osteopathic medical students’ ability to incorporate point-of-care ultrasound in assessment of the anterior knee
Source: publisher site journal article supplement (doi:10.1515/jom-2022-0186), 2023-07-06
Supplement: Supplementary file 1 [file j_jom-2022-0186_suppl_001.docx]

\,

Clinical Ultrasound Education: Knee, Pretraining Questionnaire

The following best represents my current level of training:

**OMSl 0MS2 OMS3 OMS4**

To date, I have participated in (number) of hands-on, and/or didactic, ultrasound training sessions:

0 1-2 3-4 5-6 7-8 9-10 >10 (circle one)

Including all patient care and hands-on training experiences, I **have performed**

0 1-2 3-4 5-6 7-8 9-10 >10 (circle one)

(number) of ultrasound studies:

To what extent do you agree or disagree with this statement: "I feel comfortable handling the ultrasound probe and understand what I am seeing on the screen." (circle one)

1. Strongly agree
2. Somewhat agree
3. Neither agree or disagree
4. Somewhat disagree
5. Strongly disagree

To what extent do you agree or disagree with this statement: "As of today, I feel confident in my ability to differentiate various normal tissues and anatomic landmarks of the anterior knee, based on palpation/visual inspection." (circle one)

1. Strongly agree
2. Somewhat agree
3. Neither agree or disagree
4. Somewhat disagree
5. Strongly disagree

To what extent do you agree or disagree with this statement: "As of today, I can reliably differentiate a joint effusion, prepatellar bursitis, and cellulitis ofthe anterior knee, based on palpation/visual inspection." (circle one)

1. Strongly agree
2. Somewhat agree
3. Neither agree or disagree
4. Somewhat disagree
5. Strongly disagree

To what extent do you agree or disagree with this statement: "As of today, I feel confident in my ability to differentiate various normal tissues and anatomic landmarks of the anterior knee, using point-of-care ultrasound." (circle one)

1. Strongly agree

B. Somewhat agree

C. Neither agree or disagree

1. Somewhat disagree
2. Strongly disagree

To what extent do you agree or disagree with this statement: "As of today, I can reliably differentiate a joint effusion, prepatellar bursitis, and cellulitis of the anterior knee, using point-of-care ultrasound." (circle one)

1. Strongly agree

B. somewhat agree .

1. Neither agree or disagree
2. Somewhat disagree
3. Strongly disagree
