# Supplementary material for: Effects of a focused training on first-year osteopathic medical students’ ability to incorporate point-of-care ultrasound in assessment of the anterior knee
Source: publisher site journal article supplement (doi:10.1515/jom-2022-0186), 2023-07-06
Supplement: Supplementary file 2 [file j_jom-2022-0186_suppl_002.docx]

Clinical Ultrasound Education: Knee, Posttraining Questionnaire

To **what** extent do you agree or disagree with this statement: "I feel comfortable handling the ultrasound probe and understand what I am seeing on the screen." (circle one)

1. Strongly agree
2. Somewhat agree
3. Neither agree or disagree
4. Somewhat disagree
5. Strongly disagree

To what extent do you agree or disagree with this statement: "As of today, I can reliably differentiate a joint effusion, prepatellar bursitis, and cellulitis of the anterior knee, based on palpation/visual inspection." (circle one)

1. Strongly agree
2. Somewhat agree
3. Neither agree or disagree
4. Somewhat disagree
5. Strongly disagree

To what extent do you agree or disagree with this statement: "As of today, I feel confident in my ability to detect various normal tissues and anatomic landmarks of the anterior knee, using point-of-care ultrasound." (circle one)

1. Strongly agree
2. Somewhat agree
3. Neither agree or disagree
4. Somewhat disagree
5. Strongly disagree

To what extent do you agree or disagree with this statement: "As of today, I can reliably differentiate a joint effusion, prepatellar bursitis, and cellulitis of the anterior knee, using point-of-care ultrasound." (circle one)

1. Strongly agree
2. Somewhat agree
3. Neither agree or disagree
4. Somewhat disagree
5. Strongly disagree

To what extent do you agree or disagree with this statement: ''This ultrasound training will change how I diagnose and manage patients who present with a swollen, painful knee." (circle one)

1. Strongly agree
2. Somewhat agree
3. Neither agree or disagree
4. Somewhat disagree
5. Strongly disagree

"I get the **majority** of my **ultrasound** training/information from the following sources:" (circle all that apply)

Med School On-line Training Med School Live Lecture Med School Lab/Hands-on

On-line Podcasts/Tutorials (not from school) On-line Videos/Images (not from school)

On-line Articles (not from school)

Outside Clinical Rotations

Outside Courses/Seminars Other: _
